# Supplementary material for: Chemotherapy outcome predictive effectiveness by the Oncogramme: pilot trial on stage-IV colorectal cancer
Source: Springer Nature journal article supplement (doi:10.1186/s12967-016-0765-4), 2016-01-12
Supplement: MOESM1 [file 9767402]

| Inclusion criteria                                                                    | Exclusion criteria                                                                         |
|---------------------------------------------------------------------------------------|--------------------------------------------------------------------------------------------|
| Age $\geq$ 18 years                                                                   | Contraindication to paraclinic exploration necessary to patient follow-up                  |
| Stage-IV colorectal adenocarcinoma diagnosed                                          | Use of concomitant chemotherapy, hormonotherapy or radiotherapy before final diagnosis     |
| Surgical resection of primary tumor                                                   | Contraindication to chemotherapy                                                           |
| Treatment involving a standard chemotherapeutic protocol (5-FU + FA, FOLFIRI, FOLFOX) | Pregnancy, breastfeeding or absence of birthcontrol method for females of childbearing age |
| Tumor lesions must be measurable according to RECIST 2009                             | Difficulty to understand the whole clinical protocol                                       |
| Absence of patient opposition                                                         | Absence of social security                                                                 |
| -                                                                                     | Patients under legal protection                                                            |

Table S1

Criteria for inclusion and exclusion of CRC patients used in the Oncogramme pilot trial.
